# Supplementary material for: Inflammation-induced inhibition of chaperone-mediated autophagy maintains the immunosuppressive function of murine mesenchymal stromal cells
Source: PubMed Central journal article supplement (PMC8167126; doi:10.1038/s41423-019-0345-7), 2020-01-03
Supplement: 41423_2019_345_MOESM2_ESM.pdf [file 41423_2019_345_MOESM2_ESM.pdf]

### **Supplementary Movie 1**

Mitomycin pretreated SCR-MSCs (**Supplementary Movie 1a**) and L2A-KD MSCs (**Supplementary Movie 1b**) were cocultured with splenocytes in the presence of anti-CD3/CD28 antibodies. Took images every 30min within 12h of coculture initiation by Operetta High-Content Imaging System.
